# Supplementary material
Source: PubMed Central journal article supplement (PMC7521633)
Supplement: supp_RA120.013503_159570_2_supp_565711_qdkbm7.pdf [file supp_RA120.013503_159570_2_supp_565711_qdkbm7.pdf]

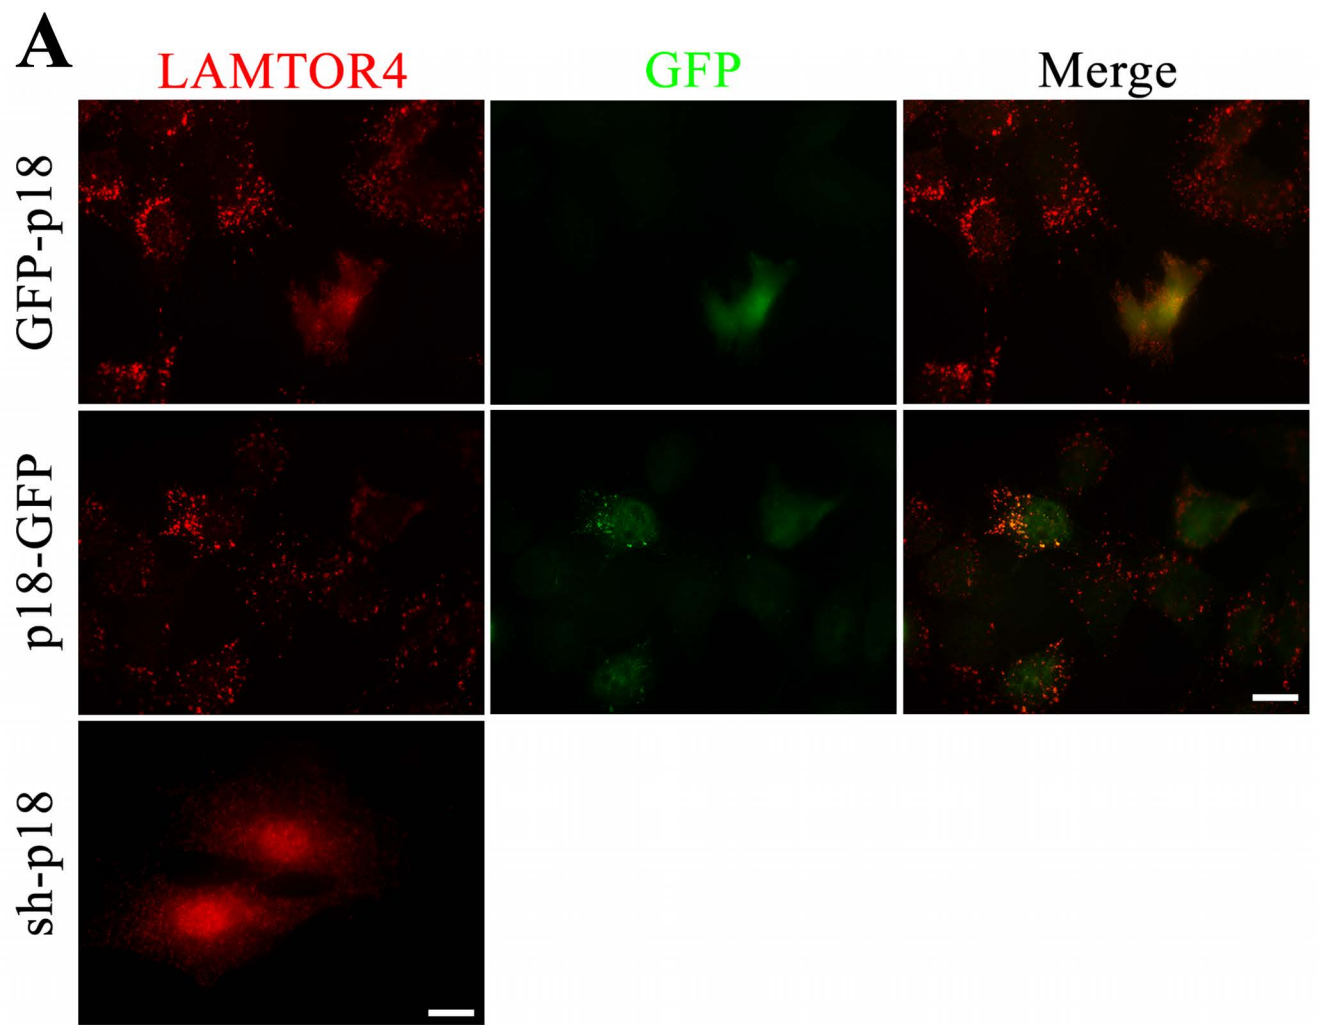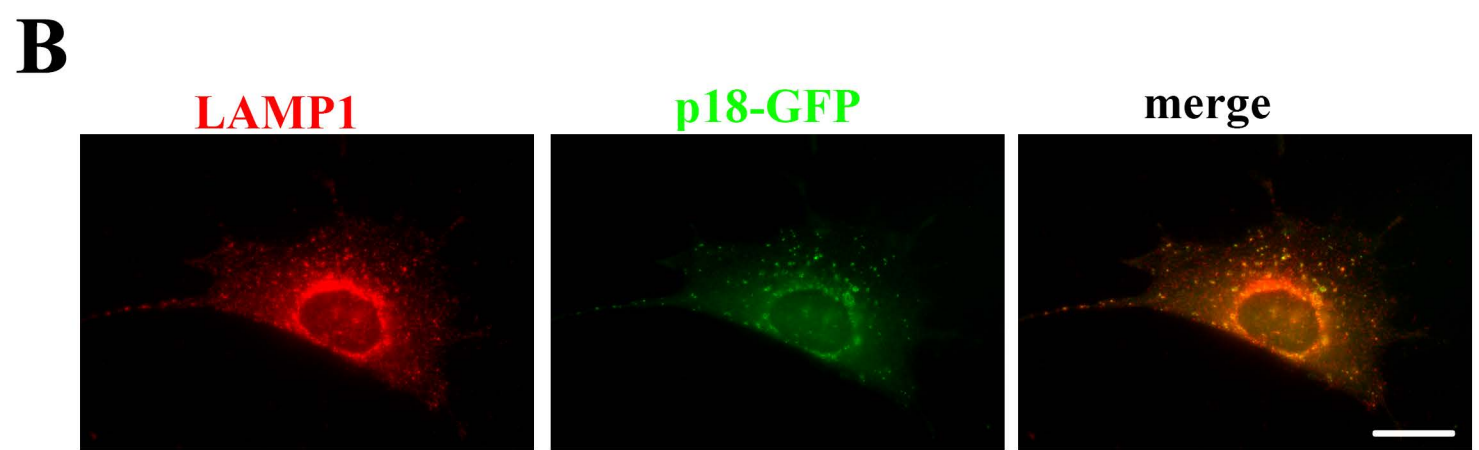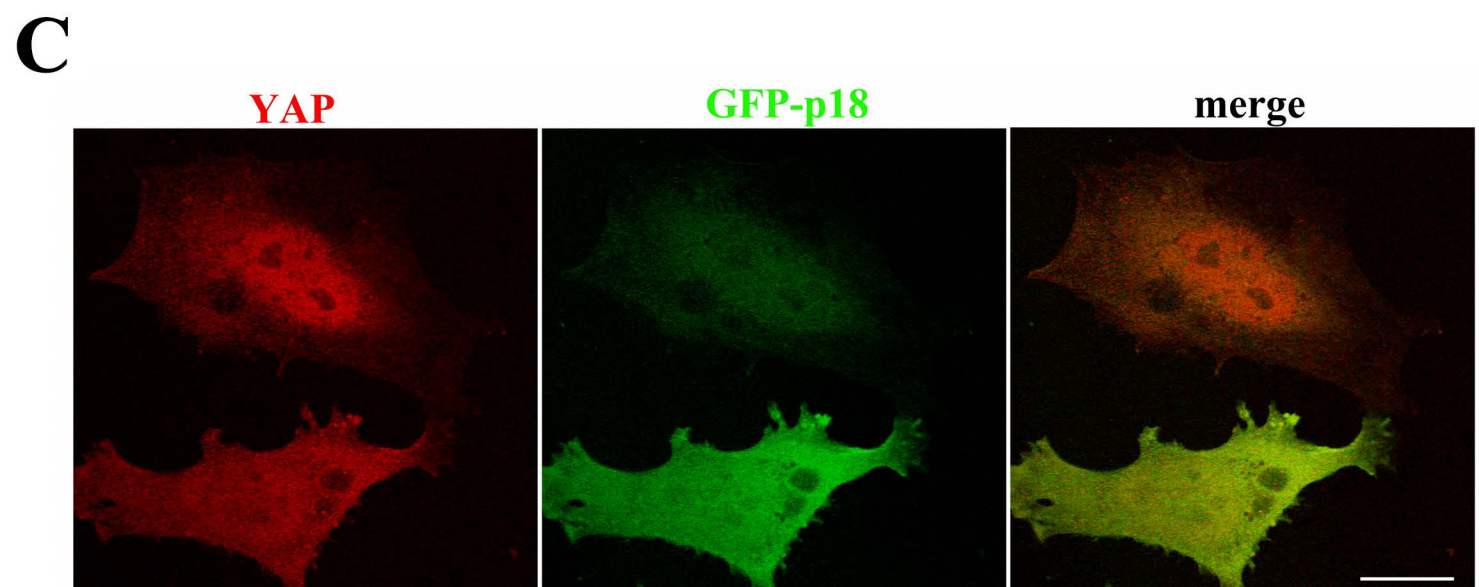

**Figure S1**

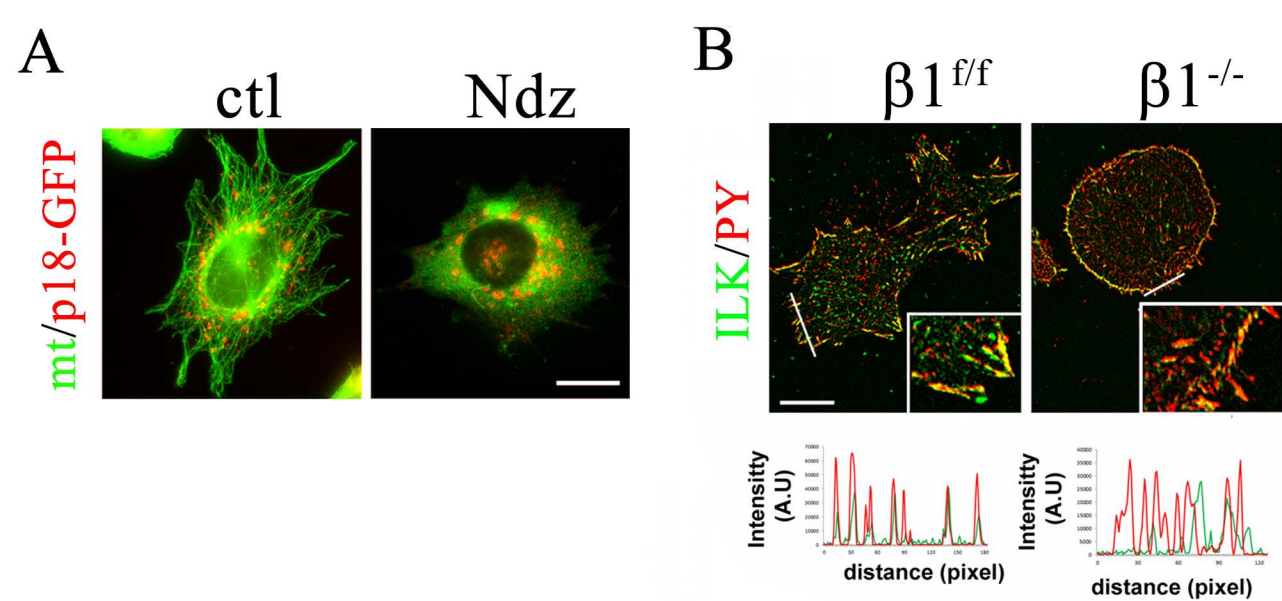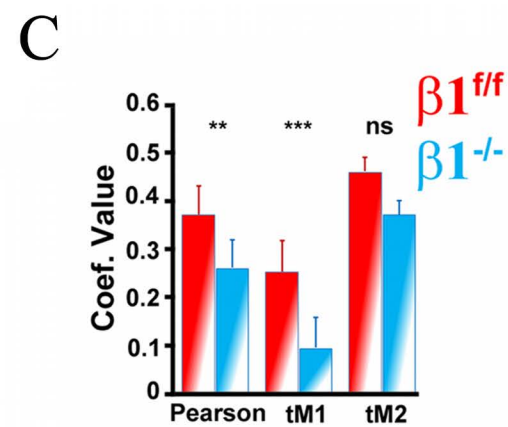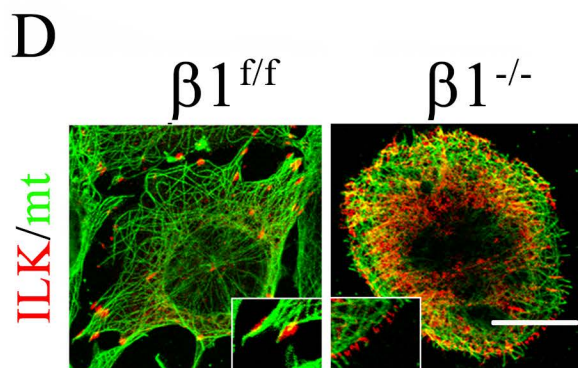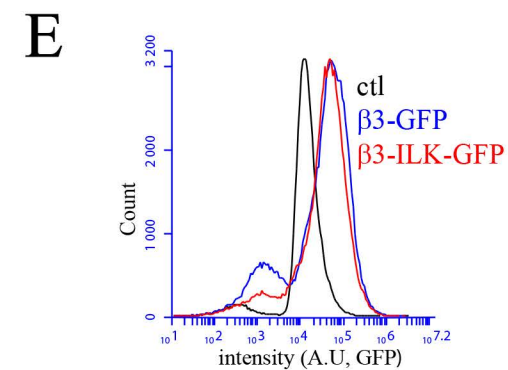

Figure S2

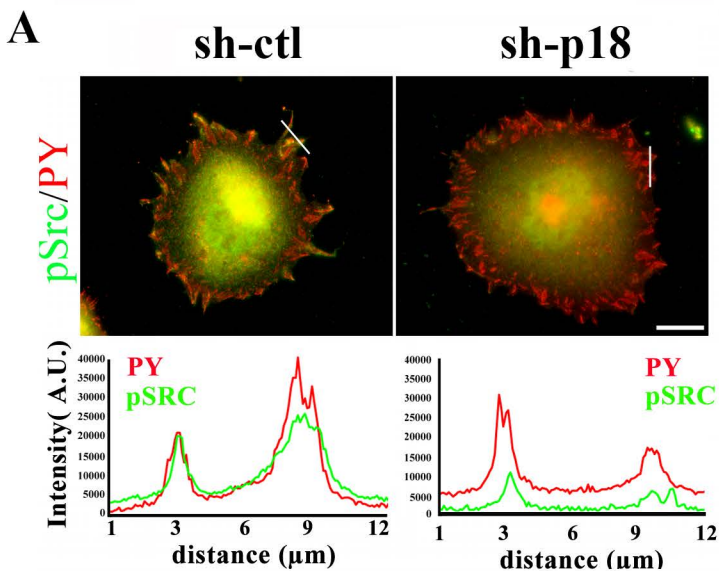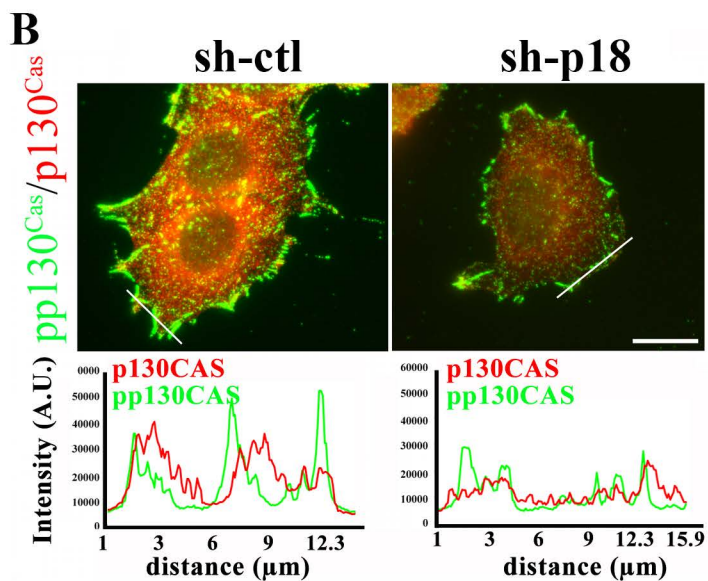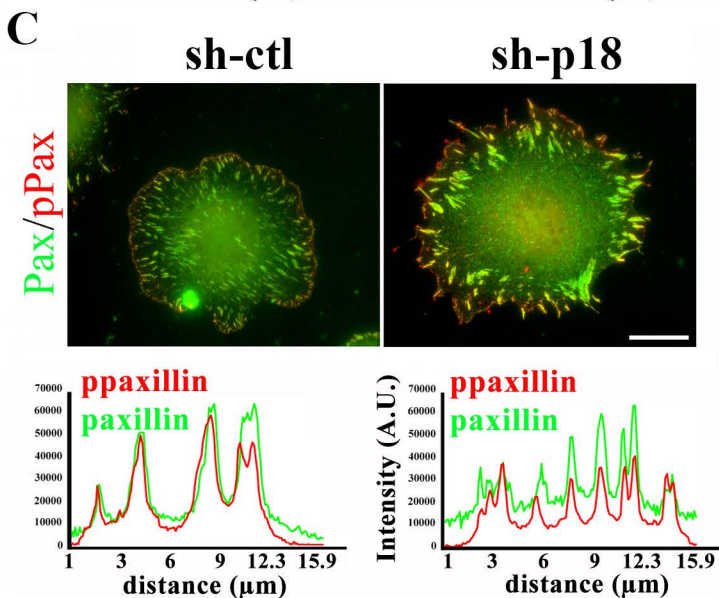

Figure S3

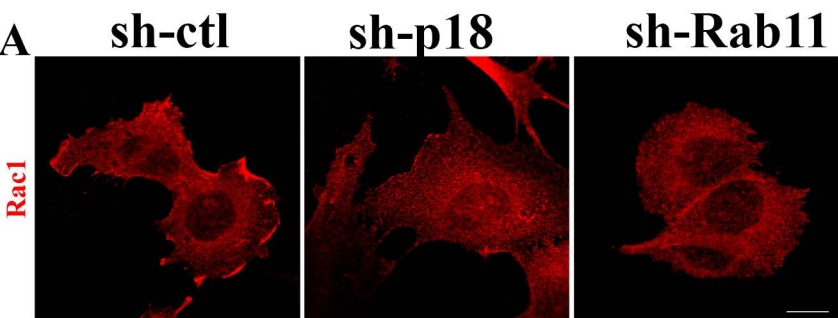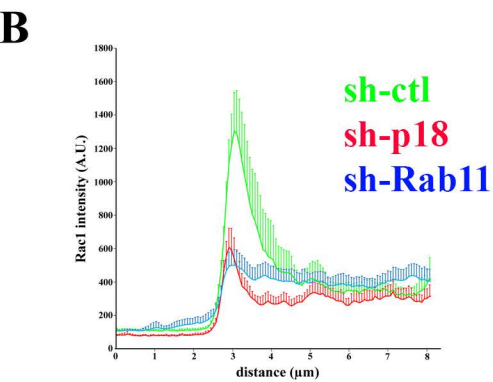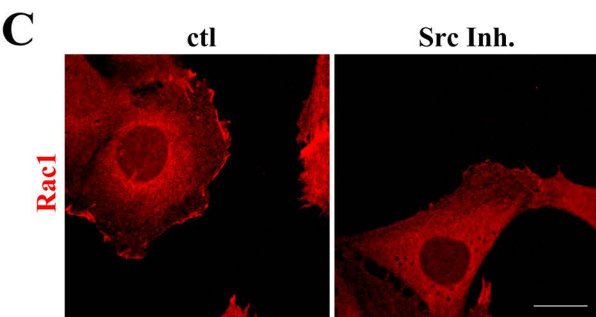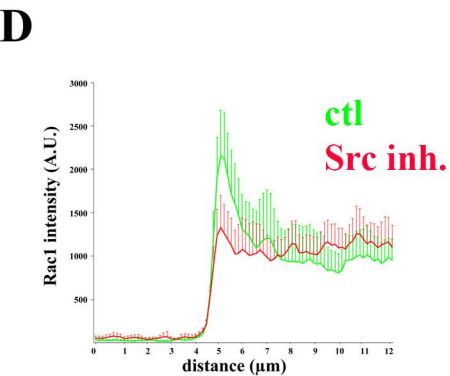

**Fig. S4**

## Legends to Supplementary Figures.

### **Figure S1 Loss of p18/LAMTOR1 or expression of dominant negative form of p18/LAMTOR1 affects LAMTOR complex docking to LE and YAP nuclear localization.**

- A.** Pre-osteoblast cells expressing GFP-p18 (dominant negative form), p18-GFP (functional p18) and sh p18/LAMTOR1 were cultured overnight and stained for LAMTOR4. Note that GFP-p18 is diffusely distributed in the cytoplasm and LAMTOR4 no longer detected at typical vesicles. Bar: 10 $\mu$ m.
- B.** LAMP1 (late endosome marker) expression analysis in pre-osteoblast cells that stably express p18/LAMTOR1-GFP after overnight growth on glass coverslips. Bar: 10 $\mu$ m.
- C.** YAP (red) expression analysis in pre-osteoblast cells that express a dominant negative form of p18/LAMTOR1 (GFP-p18). Cells were grown overnight on glass coverslips. Scale bar: 10 $\mu$ m.

### **Figure S2. ILK is enriched in FAs in a $\beta$ 1 integrin-dependent manner.**

- A.** Pre-osteoblasts that express p18-GFP were grown overnight on glass coverslips. p18/LAMTOR1 (red) and microtubules (green) were analyzed in control cells (ctl) and in cells incubated with nocodazole (Ndz, 10 $\mu$ g/ml, 1h). Bar: 10 $\mu$ m.
- B.** Control ( $\beta$ 1<sup>f/f</sup>) and  $\beta$ 1 integrin-deficient ( $\beta$ 1<sup>-/-</sup>) pre-osteoblasts that stably express ILK-GFP were grown overnight on glass coverslips, and FAs stained using an anti-phosphotyrosine monoclonal antibody (PY, upper panel). The line intensity profiles (bottom) were obtained using the Icy software plugin. Bar: 10 $\mu$ m.

- C. Histogram representing the Pearson and thresholded Manders coefficients (tM1, tM2) obtained from confocal microscopy images of  $\beta 1^{f/f}$  and  $\beta 1^{-/-}$  pre-osteoblasts that stably express ILK-GFP and stained with anti-phosphotyrosine antibody to label FAs. Data are the mean  $\pm$ SD of  $n > 20$  cells/condition (two-tailed unpaired Student's *t*-test).
- D.  $\beta 1^{f/f}$  and  $\beta 1^{-/-}$  pre-osteoblasts that stably express ILK-GFP (red) were grown overnight on glass coverslips and stained for microtubules (green). Bar: 10 $\mu$ m.
- E.  $\beta 1^{-/-}$  pre-osteoblasts stably expressing  $\beta 3$ -ILK-GFP,  $\beta 3$ -GFP or not were analyzed by flow cytometry (BD Accuri<sup>TM</sup> C6).

**Figure S3. Phosphorylation of Src and Src substrates in p18/LAMTOR1-silenced cells.**

Control cells (sh-ctl) and p18/LAMTOR1-silenced cells (sh-p18) were grown overnight on glass coverslips and stained with antibodies against:

- A. phosphorylated Src (pSrc, green) and phosphorylated tyrosines (PY, red),
- B. phosphorylated p130<sup>CAS</sup> (pp130<sup>CAS</sup>, green) and p130<sup>CAS</sup> (red),
- C. paxillin, (green) and paxillin phosphorylated at Y31 (pPaxillin<sup>Y31</sup>, red).

The line intensity profiles were obtained using the Icy software plugin. Bar: 10 $\mu$ m.

**Figure S4. Rab-11, p18/LAMTOR1 and Src activity regulate Rac1 subcellular localization.**

- A. Pre-osteoblasts that express scramble (sh-ctl), and shRNAs against Rab-11 (sh-Rab-11) and p18/LAMTOR1 (sh-p18) were grown overnight on glass coverslips and stained for Rac1. Bar: 10 $\mu$ m.

- B.** Comparison of Rac1 distribution (fluorescence intensity) in sh-ctl (green), sh-Rab-11 (blue) and sh-p18 (red) cells. The line profiles were obtained using the Fiji analysis software (30 regions/condition were selected for quantification).
- C.** Pre-osteoblasts were grown overnight on glass coverslips and incubated or not with the specific Src inhibitor 5 (1 $\mu$ M for 2h) and stained for Rac1. Bar: 10 $\mu$ m.
- D.** Comparison of Rac1 distribution (fluorescence intensity) in pre-osteoblasts incubated (red) or not (green) with the Src inhibitor 5 (1 $\mu$ M for 2h) using fluorescence intensity. The line profiles were obtained using the Fiji analysis software (30 regions/conditions).
